# Supplementary material for: SOX2-specific adaptive immunity and response to immunotherapy in non-small cell lung cancer
Source: PubMed Central journal article supplement — Oncoimmunology. 2013 Jun 10;2(7):e25205. doi: 10.4161/onci.25205 (PMC3782159; doi:10.4161/onci.25205), 2013-06-10
Supplement: onci-2-e25205-s01.pdf [file onci-2-e25205-s01.pdf]

## **Supplemental Material to:**

**Kavita Dhodapkar, Scott Gettinger, Rituparana Das, Henry Zebroski and Madhav Dhodapkar**

**SOX2-specific adaptive immunity and response to immunotherapy in non-small cell lung cancer**

**Oncoimmunology; 2(7)**

**<http://dx.doi.org/10.4161/onci.25205>**

**[http://www.landesbioscience.com/journals/oncoimmunology/  
article/25205/](http://www.landesbioscience.com/journals/oncoimmunology/article/25205/)**

***Supplementary Table 1. Clinical characteristics of patients (n = 24) analyzed for correlation with response to immunotherapy.***

***Supplementary Table 2. Composition/ sequences of peptide mixes. A. Peptide sequences for overlapping peptide library from SOX2. B. Peptide sequences for overlapping peptide library from NY-ESO-1.***

Supplementary Table 1.

Patient Characteristics:

| <b>Characteristic</b>           | <b>n/N (%)</b>               |
|---------------------------------|------------------------------|
| Median Age                      | 66 years (range 48-83 years) |
| Sex                             |                              |
| Male                            | 15/ 24 (62%)                 |
| Female                          | 9/ 24 (38%)                  |
| Histology:                      |                              |
| Squamous                        | 12 /24 (50%)                 |
| Non-squamous                    | 12/24 (50%)                  |
| Advanced Disease (Stage III/IV) | 24/24 (100%)                 |
| Prior Therapy                   | 24/24 (100%)                 |
| SOX2 Expression                 | 5/11 (45%)                   |

n/N= Number positive / Total or numbers tested

Supplemental Table 2A: SOX2 Peptide library

| Nr. | Sequence                        |
|-----|---------------------------------|
| 1   | H-S-A-R-M-Y-N-M-M-E-T-E-L-K     |
| 2   | R-M-Y-N-M-M-E-T-E-L-K-P-P-G     |
| 3   | N-M-M-E-T-E-L-K-P-P-G-P-Q-Q-T   |
| 4   | T-E-L-K-P-P-G-P-Q-Q-T-S-G-G-G   |
| 5   | P-P-G-P-Q-Q-T-S-G-G-G-G-G-N-S   |
| 6   | P-Q-Q-T-S-G-G-G-G-G-N-S-T-A-A   |
| 7   | S-G-G-G-G-G-N-S-T-A-A-A-A-G-G   |
| 8   | G-G-N-S-T-A-A-A-A-G-G-N-Q-K     |
| 9   | S-T-A-A-A-A-G-G-N-Q-K-N-S       |
| 10  | A-A-A-A-G-G-N-Q-K-N-S-P-D-R-V   |
| 11  | G-G-N-Q-K-N-S-P-D-R-V-K-R-P-M   |
| 12  | K-N-S-P-D-R-V-K-R-P-M-N-A-F-M   |
| 13  | D-R-V-K-R-P-M-N-A-F-M-V-W-S-R   |
| 14  | R-P-M-N-A-F-M-V-W-S-R-G-Q-R-R   |
| 15  | A-F-M-V-W-S-R-G-Q-R-R-K-M-A     |
| 16  | V-W-S-R-G-Q-R-R-K-M-A-Q-E-N-P-K |
| 17  | G-Q-R-R-K-M-A-Q-E-N-P-K-M-H     |
| 18  | R-K-M-A-Q-E-N-P-K-M-H-N-S-E-I   |
| 19  | A-Q-E-N-P-K-M-H-N-S-E-I-S-K-R   |
| 20  | P-K-M-H-N-S-E-I-S-K-R-L-G-A     |
| 21  | H-N-S-E-I-S-K-R-L-G-A-E-W-K-L   |
| 22  | I-S-K-R-L-G-A-E-W-K-L-L-S-E-T   |
| 23  | L-G-A-E-W-K-L-L-S-E-T-E-K-R     |
| 24  | E-W-K-L-L-S-E-T-E-K-R-P-F-I     |
| 25  | L-L-S-E-T-E-K-R-P-F-I-D-E-A-K   |
| 26  | T-E-K-R-P-F-I-D-E-A-K-R-L-R-A   |
| 27  | P-F-I-D-E-A-K-R-L-R-A-L-H-M-K   |
| 28  | E-A-K-R-L-R-A-L-H-M-K-E-H       |

29 K-R-L-R-A-L-H-M-K-E-H-P-D-Y-K  
30 A-L-H-M-K-E-H-P-D-Y-K-Y-R-P-R  
31 K-E-H-P-D-Y-K-Y-R-P-R-R-K-T-K  
32 D-Y-K-Y-R-P-R-R-K-T-K-T-L-M-K  
33 R-P-R-R-K-T-K-T-L-M-K-K-D-K-Y  
34 K-T-K-T-L-M-K-K-D-K-Y-T-L-P-G  
35 L-M-K-K-D-K-Y-T-L-P-G-G-L-L-A  
36 D-K-Y-T-L-P-G-G-L-L-A-P-G-G  
37 T-L-P-G-G-L-L-A-P-G-G-N-S-M-A  
38 G-L-L-A-P-G-G-N-S-M-A-S-G-V-G  
39 P-G-G-N-S-M-A-S-G-V-G-V-G-A-G  
40 S-M-A-S-G-V-G-V-G-A-G-L-G-A-G  
41 G-V-G-V-G-A-G-L-G-A-G-V-N-Q-R  
42 G-A-G-L-G-A-G-V-N-Q-R-M-D-S-Y  
43 G-A-G-V-N-Q-R-M-D-S-Y-A-H-M  
44 V-N-Q-R-M-D-S-Y-A-H-M-N-G-W-S  
45 M-D-S-Y-A-H-M-N-G-W-S-N-G-S-Y  
46 A-H-M-N-G-W-S-N-G-S-Y-S-M-M  
47 N-G-W-S-N-G-S-Y-S-M-M-Q-D-Q-L  
48 N-G-S-Y-S-M-M-Q-D-Q-L-G-Y  
49 S-Y-S-M-M-Q-D-Q-L-G-Y-P-Q-H  
50 M-M-Q-D-Q-L-G-Y-P-Q-H-P-G-L  
51 D-Q-L-G-Y-P-Q-H-P-G-L-N-A-H-G  
52 Y-P-Q-H-P-G-L-N-A-H-G-A-A-Q-M  
53 P-G-L-N-A-H-G-A-A-Q-M-Q-P-M-H  
54 A-H-G-A-A-Q-M-Q-P-M-H-R-Y-D-V  
55 A-Q-M-Q-P-M-H-R-Y-D-V-S-A-L  
56 M-Q-P-M-H-R-Y-D-V-S-A-L-Q-Y  
57 M-H-R-Y-D-V-S-A-L-Q-Y-N-S-M-T  
58 D-V-S-A-L-Q-Y-N-S-M-T-S-S-Q-T  
59 L-Q-Y-N-S-M-T-S-S-Q-T-Y-M-N-G

60 S-M-T-S-S-Q-T-Y-M-N-G-S-P-T-Y  
61 S-Q-T-Y-M-N-G-S-P-T-Y-S-M-S-Y  
62 M-N-G-S-P-T-Y-S-M-S-Y-S-Q-Q-G  
63 P-T-Y-S-M-S-Y-S-Q-Q-G-T-P-G-M  
64 M-S-Y-S-Q-Q-G-T-P-G-M-A-L-G-S  
65 S-Q-Q-G-T-P-G-M-A-L-G-S-M-G-S  
66 T-P-G-M-A-L-G-S-M-G-S-V-V-K-S  
67 A-L-G-S-M-G-S-V-V-K-S-E-A-S-S  
68 M-G-S-V-V-K-S-E-A-S-S-S-P-P-V  
69 V-K-S-E-A-S-S-S-P-P-V-V-T-S-S  
70 A-S-S-S-P-P-V-V-T-S-S-S-H-S-R  
71 P-P-V-V-T-S-S-S-H-S-R-A  
72 P-V-V-T-S-S-S-H-S-R-A-P-C-Q-A  
73 S-S-S-H-S-R-A-P-C-Q-A-G-D-L-R  
74 S-R-A-P-C-Q-A-G-D-L-R-D-M-I-S  
75 C-Q-A-G-D-L-R-D-M-I-S-M-Y-L  
76 G-D-L-R-D-M-I-S-M-Y-L-P-G-A  
77 R-D-M-I-S-M-Y-L-P-G-A-E-V  
78 M-I-S-M-Y-L-P-G-A-E-V-P-E-P-A  
79 Y-L-P-G-A-E-V-P-E-P-A-A-P-S-R  
80 A-E-V-P-E-P-A-A-P-S-R-L-H-M-S  
81 E-P-A-A-P-S-R-L-H-M-S-Q-H-Y  
82 A-P-S-R-L-H-M-S-Q-H-Y-Q-S-G  
83 R-L-H-M-S-Q-H-Y-Q-S-G-P-V-P-G  
84 S-Q-H-Y-Q-S-G-P-V-P-G-T-A-I  
85 Y-Q-S-G-P-V-P-G-T-A-I-N-G-T-L  
86 P-V-P-G-T-A-I-N-G-T-L-P-L-S-H-M

Pool 1: 1-22

Pool 2: 23-44

Pool 3: 45-66

Pool 4: 67-86

Supplemental Table 2B. NYESO-1 Peptide library

| Nr. | Sequence                      |
|-----|-------------------------------|
| 1   | M-Q-A-E-G-R-G-T-G-G-S-T-G-D-A |
| 2   | G-R-G-T-G-G-S-T-G-D-A-D-G-P-G |
| 3   | G-G-S-T-G-D-A-D-G-P-G-G-P-G-I |
| 4   | G-D-A-D-G-P-G-G-P-G-I-P-D-G   |
| 5   | D-G-P-G-G-P-G-I-P-D-G-P-G-G   |
| 6   | G-G-P-G-I-P-D-G-P-G-G-N-A-G-G |
| 7   | I-P-D-G-P-G-G-N-A-G-G-P-G-E-A |
| 8   | P-G-G-N-A-G-G-P-G-E-A-G-A-T-G |
| 9   | A-G-G-P-G-E-A-G-A-T-G-G-R-G   |
| 10  | P-G-E-A-G-A-T-G-G-R-G-P-R-G-A |
| 11  | G-A-T-G-G-R-G-P-R-G-A-G-A-A-R |
| 12  | G-R-G-P-R-G-A-G-A-A-R-A-S-G   |
| 13  | P-R-G-A-G-A-A-R-A-S-G-P-G-G-G |
| 14  | G-A-A-R-A-S-G-P-G-G-G-A-P-R-G |
| 15  | A-S-G-P-G-G-G-A-P-R-G-P-H-G-G |
| 16  | G-G-G-A-P-R-G-P-H-G-G-A-A-S-G |
| 17  | P-R-G-P-H-G-G-A-A-S-G-L-N-G   |
| 18  | P-H-G-G-A-A-S-G-L-N-G-C-C-R   |
| 19  | G-A-A-S-G-L-N-G-C-C-R-C-G-A-R |
| 20  | G-L-N-G-C-C-R-C-G-A-R-G-P-E-S |
| 21  | C-C-R-C-G-A-R-G-P-E-S-R-L-L   |
| 22  | C-G-A-R-G-P-E-S-R-L-L-E-F-Y-L |
| 23  | G-P-E-S-R-L-L-E-F-Y-L-A-M-P-F |
| 24  | R-L-L-E-F-Y-L-A-M-P-F-A-T-P-M |
| 25  | F-Y-L-A-M-P-F-A-T-P-M-E-A-E-L |
| 26  | M-P-F-A-T-P-M-E-A-E-L-A-R-R-S |
| 27  | T-P-M-E-A-E-L-A-R-R-S-L-A     |

28 M-E-A-E-L-A-R-R-S-L-A-Q-D-A

29 E-L-A-R-R-S-L-A-Q-D-A-P-P-L

30 R-R-S-L-A-Q-D-A-P-P-L-P-V-P-G

Pool 1: 1-10 Pool 2: 11-20 Pool 3: 21-30
